# Supplementary material for: Indoor microbiota in severely moisture damaged homes and the impact of interventions
Source: PubMed Central journal article supplement (PMC5640920; doi:10.1186/s40168-017-0356-5), 2017-10-13

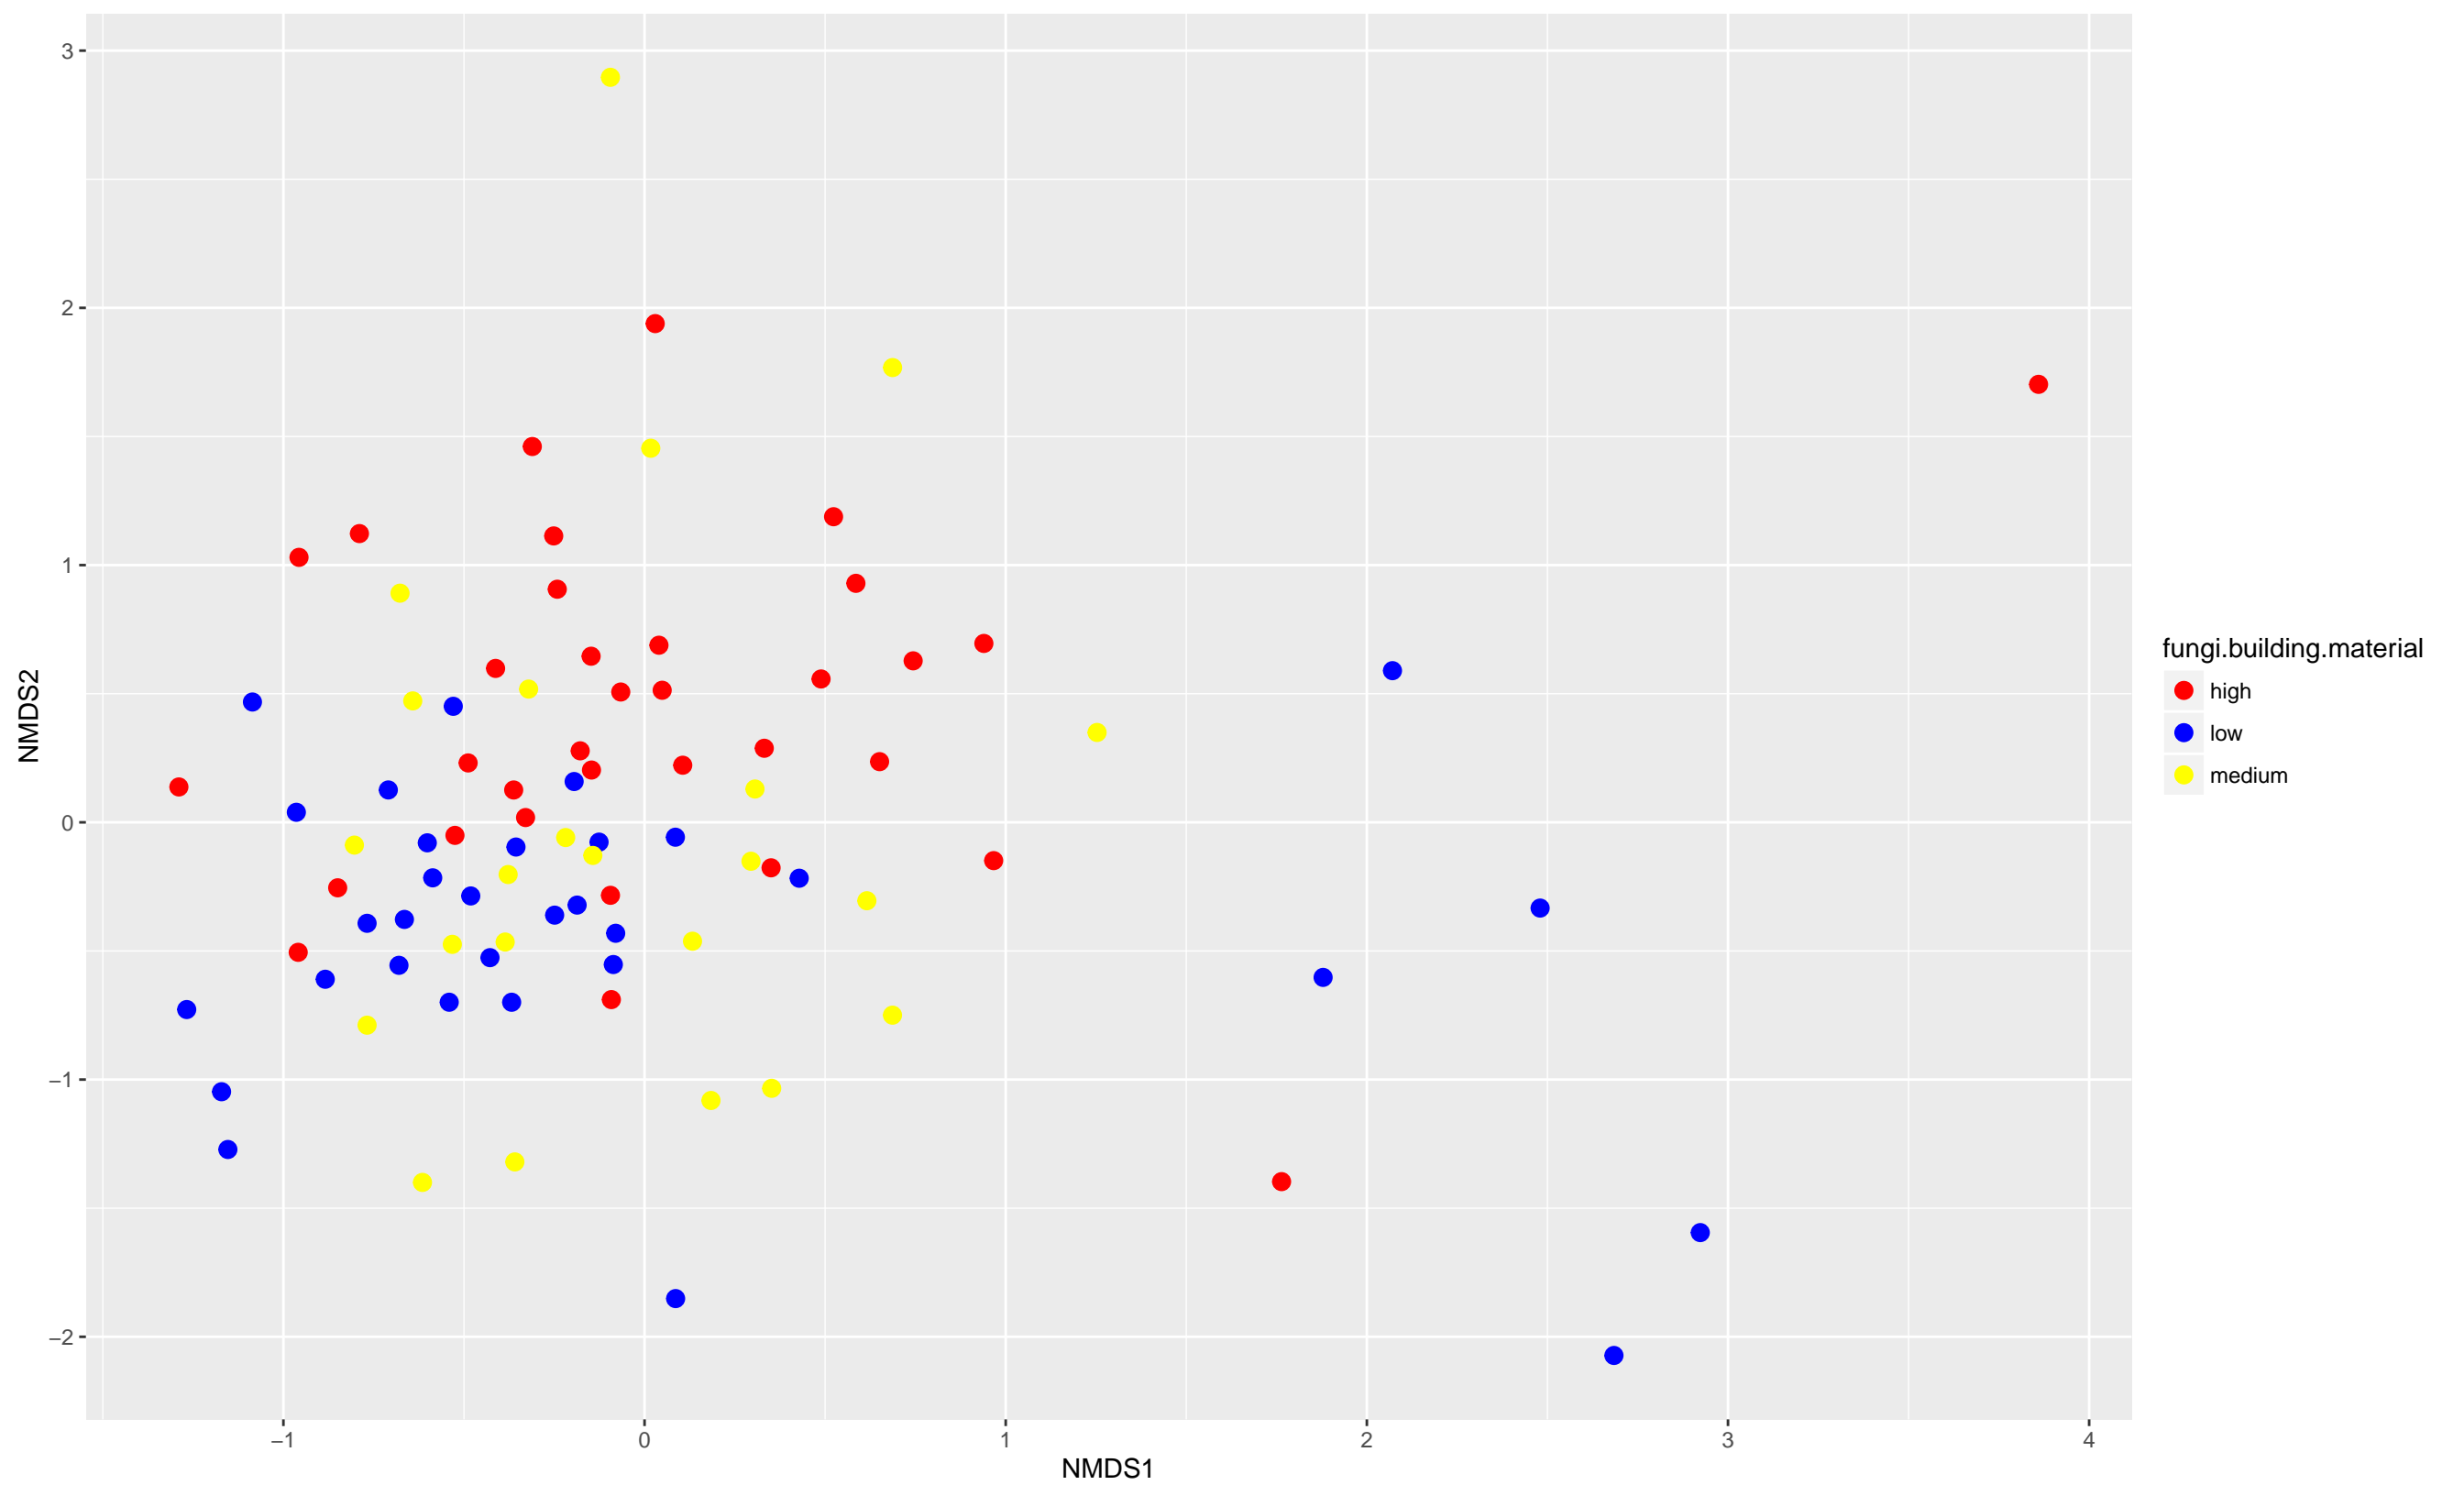

Supplement: 40168_2017_356_MOESM4_ESM.pdf [file 40168_2017_356_MOESM4_ESM.pdf]
